# Supplementary material for: Physical Activity After Percutaneous Coronary Intervention for Chronic Total Occlusion and Its Association With Health Status
Source: PubMed Central journal article supplement — J Am Heart Assoc. 2019 Mar 29;8(7):e011629. doi: 10.1161/JAHA.118.011629 (PMC6509725; doi:10.1161/jaha.118.011629), 2019-03-29
Supplement: JAH3-8-e011629-s001.pdf [file JAH3-8-e011629-s001.pdf]

# **SUPPLEMENTAL MATERIAL**

**Table S1. Baseline characteristics of excluded and included patients.**

|                                            | <b>Excluded<br/>n = 131</b> | <b>Cohort<br/>n = 869</b> | <b>P-Value</b> |
|--------------------------------------------|-----------------------------|---------------------------|----------------|
| Age                                        | 64.9 ± 11.8                 | 65.4 ± 10.0               | 0.612          |
| Male                                       | 79.4%                       | 80.6%                     | 0.754          |
| Caucasian                                  | 88.5%                       | 90.4%                     | 0.649          |
| Prior CABG                                 | 33.6%                       | 36.9%                     | 0.457          |
| Prior PCI                                  | 60.3%                       | 66.5%                     | 0.165          |
| BMI                                        | 30.3 ± 6.5                  | 30.5 ± 5.9                | 0.821          |
| Current smoker                             | 17.6%                       | 12.8%                     | 0.138          |
| History of Diabetes Mellitus               | 50.4%                       | 39.8%                     | 0.021          |
| History of CHF                             | 33.6%                       | 21.3%                     | 0.001          |
| History CKD                                | 24.4%                       | 11.9%                     | < 0.001        |
| History of Stroke/TIA                      | 10.7%                       | 7.2%                      | 0.168          |
| History PAD                                | 17.6%                       | 17.5%                     | 0.985          |
| History of Lung Disease                    | 16.8%                       | 14.0%                     | 0.402          |
| Number of antianginals on Discharge        | 1.5 ± 0.9                   | 1.6 ± 0.9                 | 0.583          |
| Any non CTO-PCI                            | 19.8%                       | 12.8%                     | 0.028          |
| Primary CTO Vessel                         |                             |                           | 0.211          |
| LAD                                        | 22.9%                       | 20.5%                     |                |
| LCX                                        | 22.1%                       | 16.1%                     |                |
| LM                                         | 0.8%                        | 0.8%                      |                |
| RCA                                        | 54.2%                       | 62.6%                     |                |
| Lesion length greater than 20mm            | 60.3%                       | 61.8%                     | 0.743          |
| Lesion #1: Crossing Successful Strategy    |                             |                           | 0.460          |
| (1) AWE                                    | 45.0%                       | 40.2%                     |                |
| (2) ADR                                    | 20.8%                       | 24.8%                     |                |
| (3) RWE                                    | 7.5%                        | 10.8%                     |                |
| (4) RD                                     | 26.7%                       | 24.3%                     |                |
| J-CTO score                                | 2.2 ± 1.2                   | 2.3 ± 1.3                 | 0.350          |
| Physiologically Complete Revascularization | 71.0%                       | 76.6%                     | 0.158          |

Data presented as mean  $\pm$  standard deviation for continuous variables or % for categorical variables.

ADR = antegrade dissection and re-entry; AWE = antegrade wire escalation; BMI = body mass index; SAQ = seattle angina questionnaire angina frequency; CABG = coronary artery bypass graft; CTO = chronic total occlusions; J-CTO = Japanese Multicenter CTO registry; LAD = left anterior descending artery; LCX = left circumferance artery; LM = left main artery; PAD = peripheral artery disease; PCI = percutaneous coronary intervention; RCA = right coronary artery ; RD = retrograde dissection; RWE = retrograde wire escalation; TIA = transient ischemic attack

**Figure S1. Predictors of Regular Exercise at 1 year including SAQ AF.**

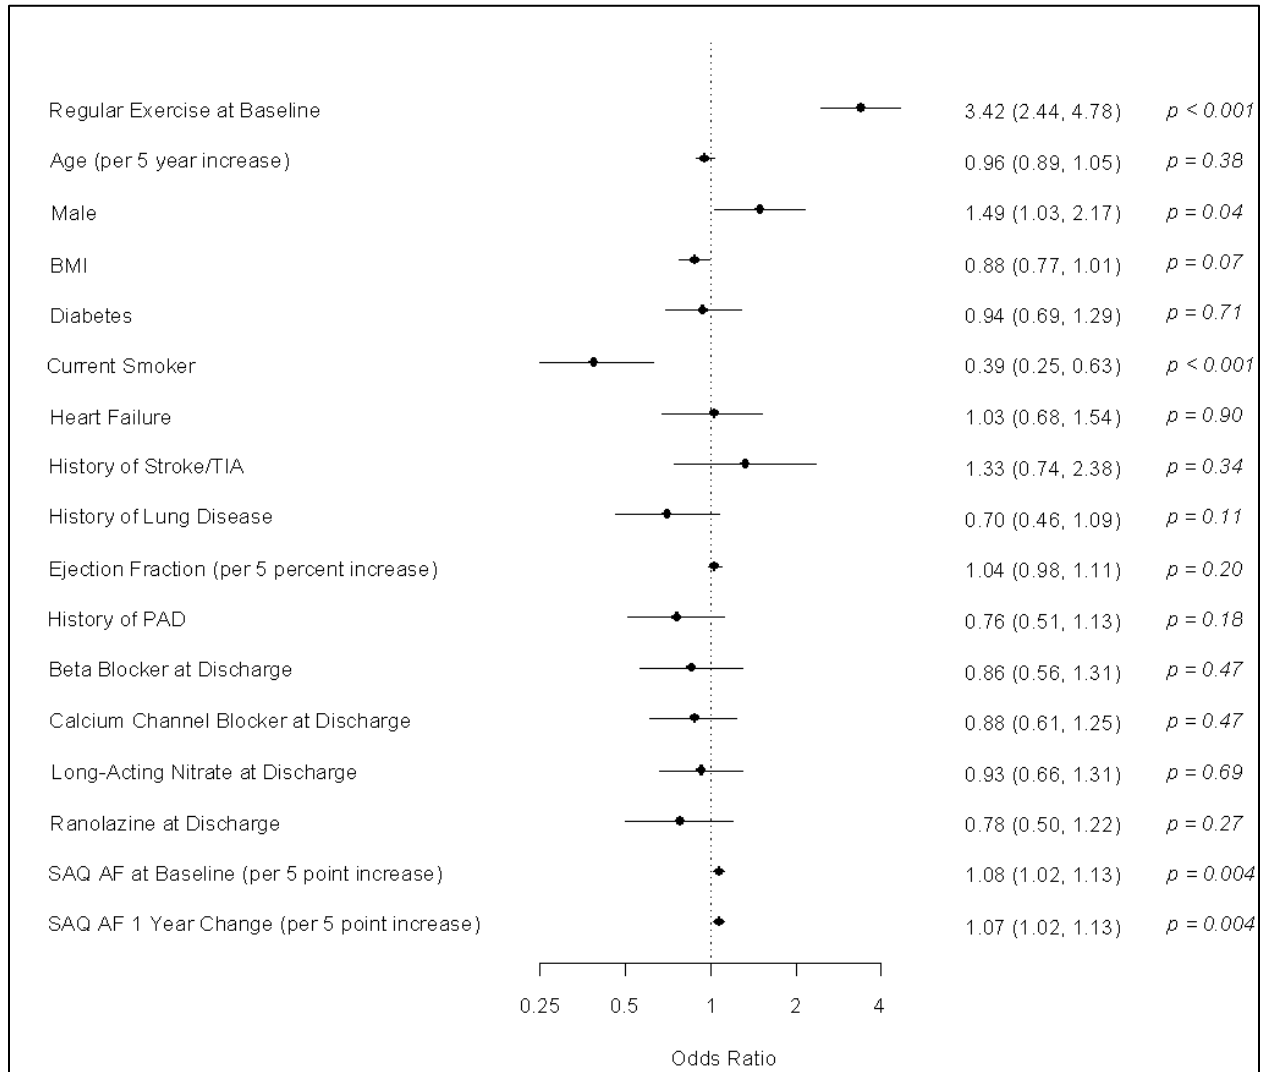

BMI = body mass index, PAD = peripheral artery disease, SAQ AF = seattle angina questionnaire angina frequency domain, TIA =transient ischemic attack,

**Figure S2. Predictors of Regular Exercise at 1 year including SAQ PL.**

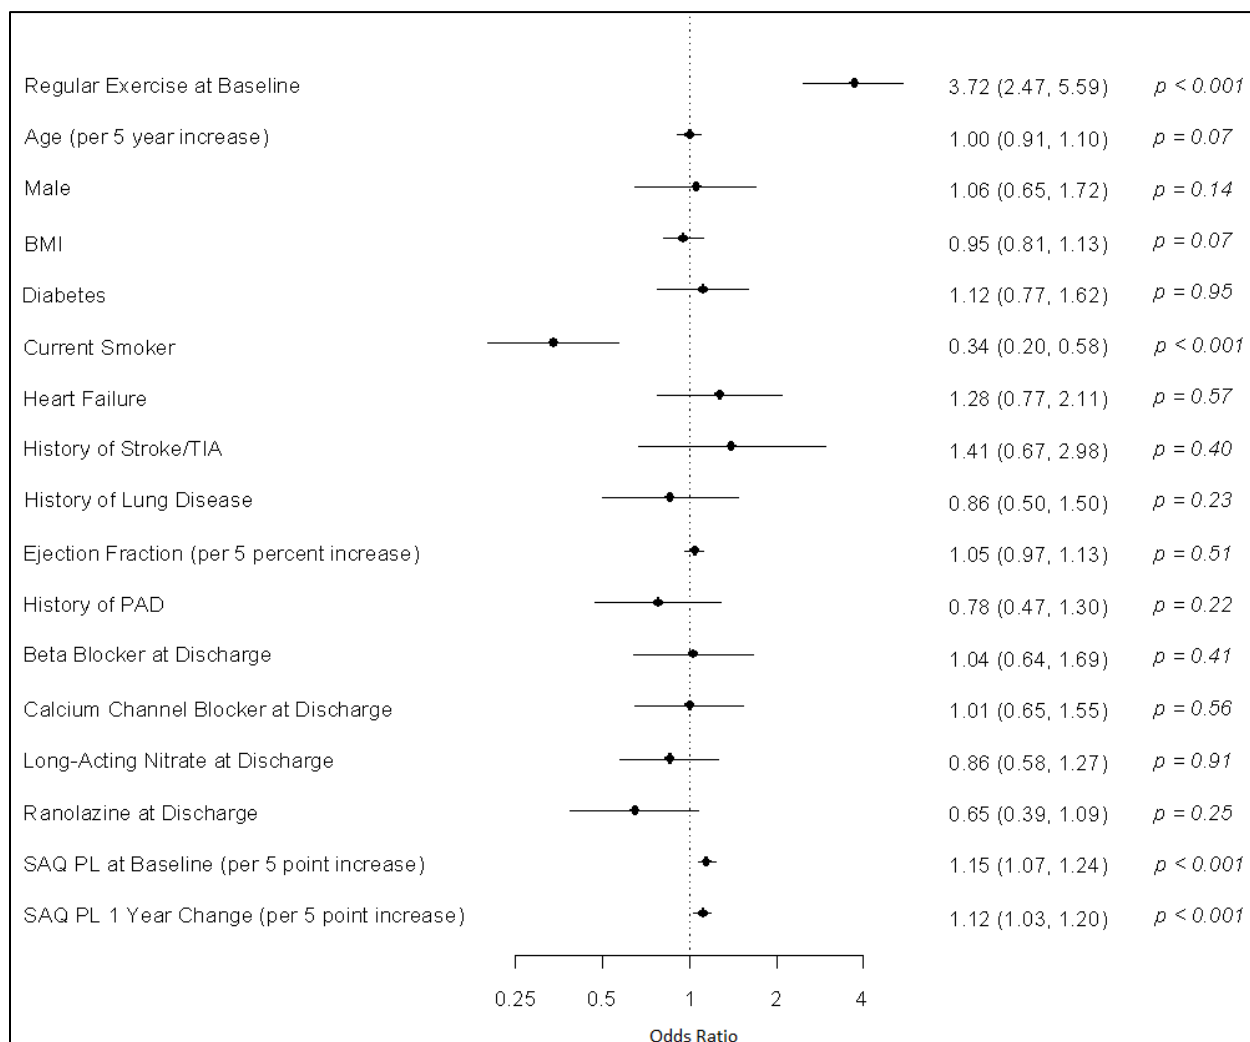

BMI = body mass index, PAD = peripheral artery disease, SAQ PL = seattle angina questionnaire physical limitations domain, TIA =transient ischemic attack,

**Figure S3. Predictors of Regular Exercise at 1 year including SAQ QOL.**

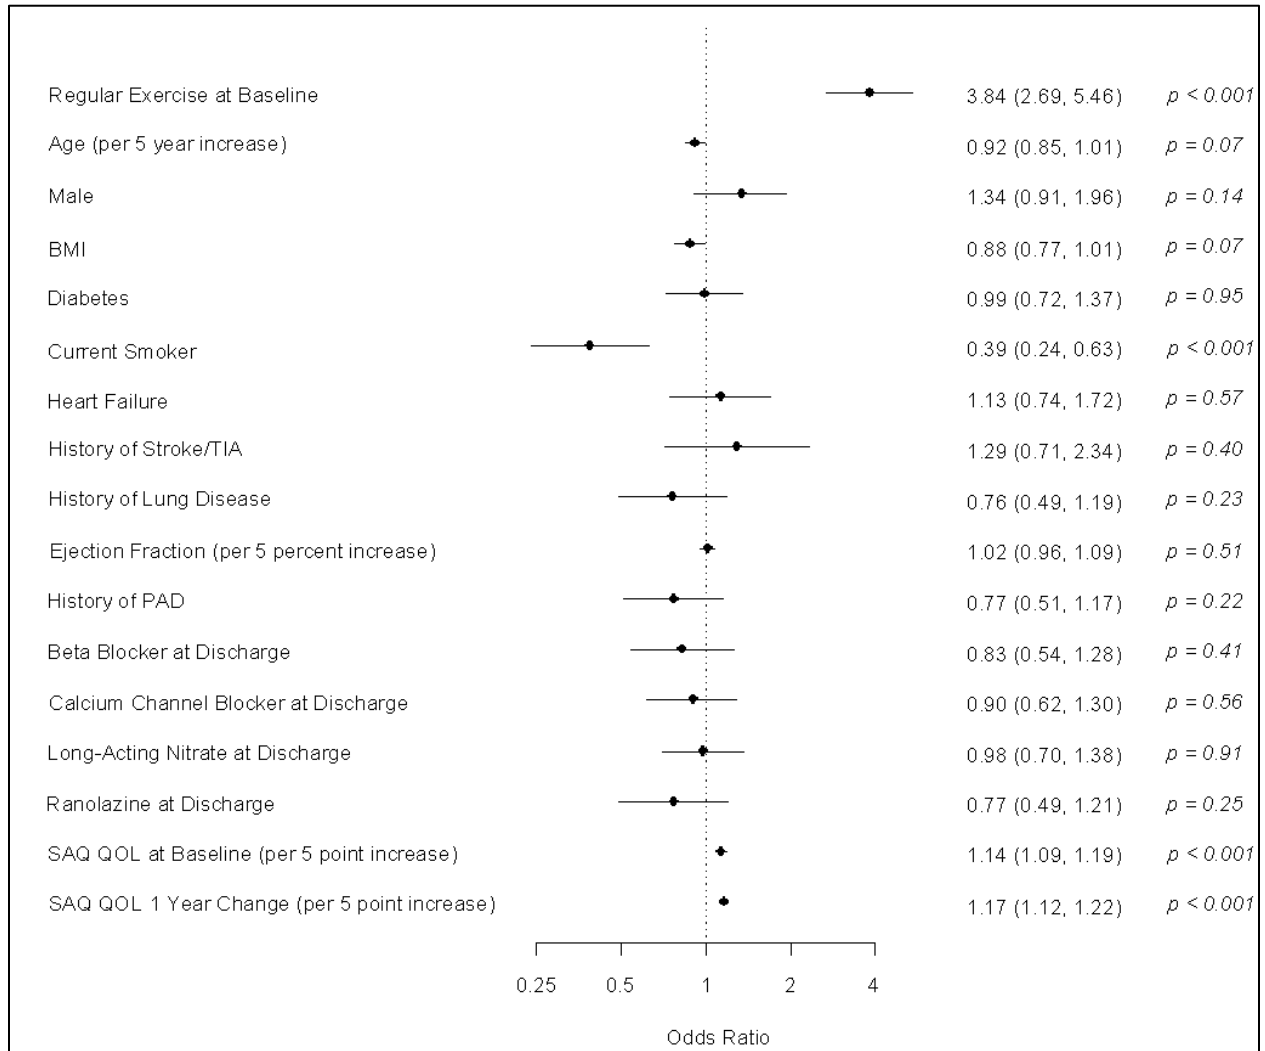

BMI = body mass index, PAD = peripheral artery disease, SAQ QoL = seattle angina questionnaire quality of life domain, TIA =transient ischemic attack

**Figure S4. Association of change in exercise and health status change at 1 year among patients with successful CTO PCI at 6 months.**

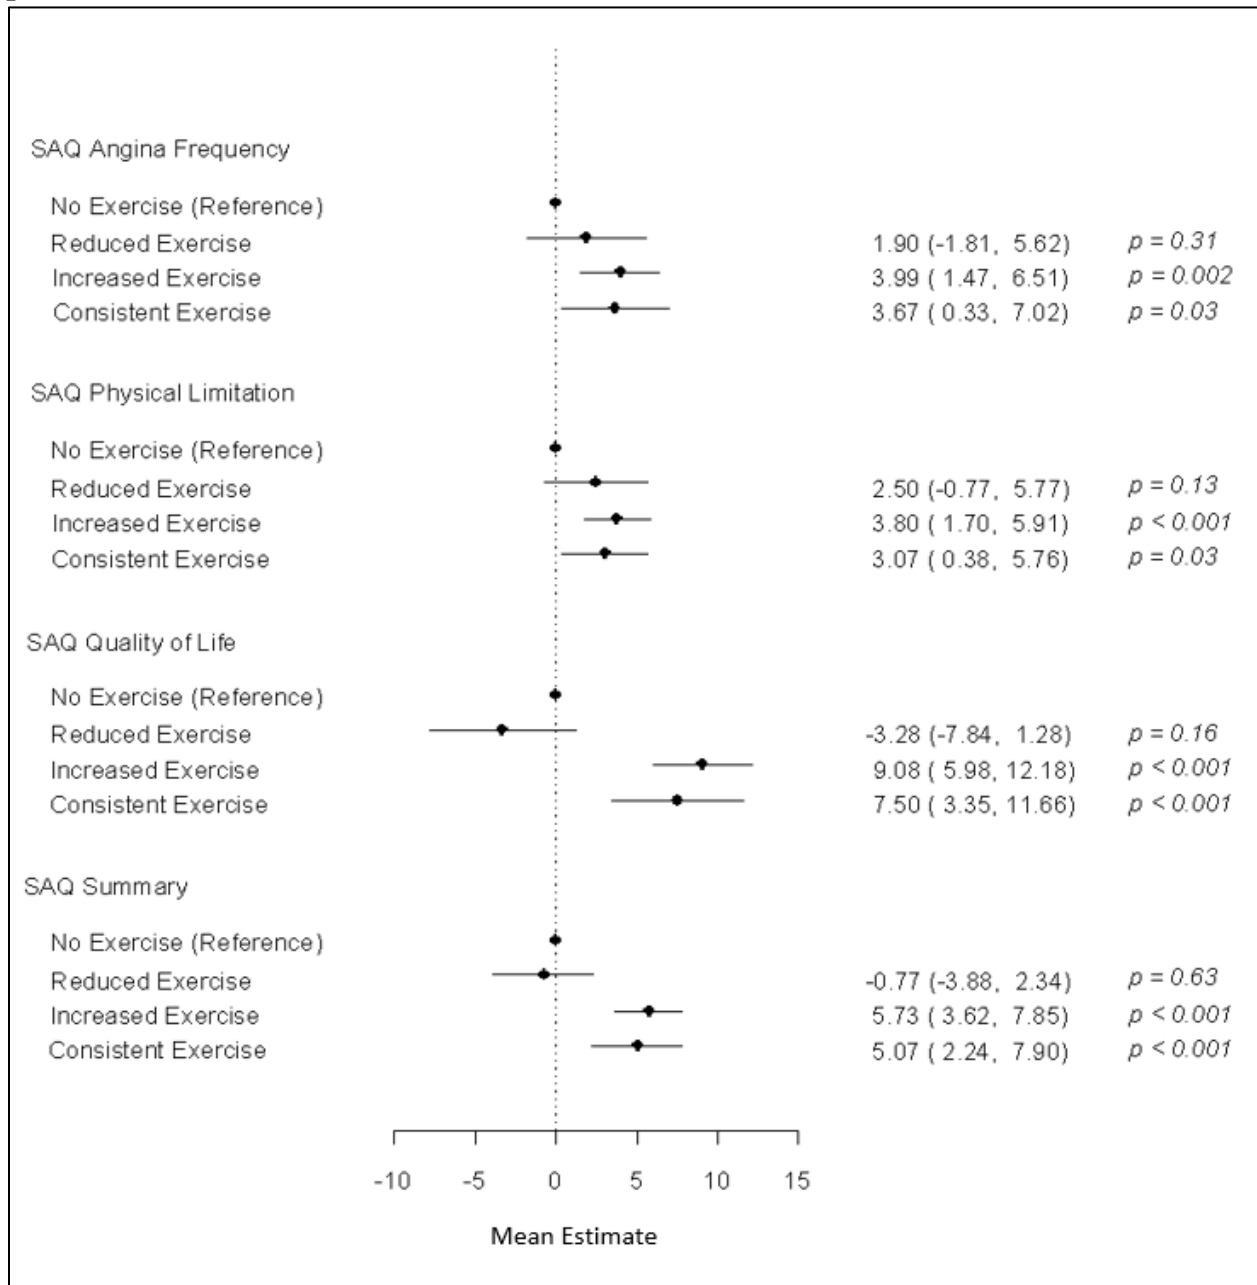

CTO PCI = percutaneous coronary intervention of chronic total occlusion. SAQ = seattle angina questionnaire

**Figure S5. Predictors of exercise at 1 year among patients with successful CTO PCI at 6 months.**

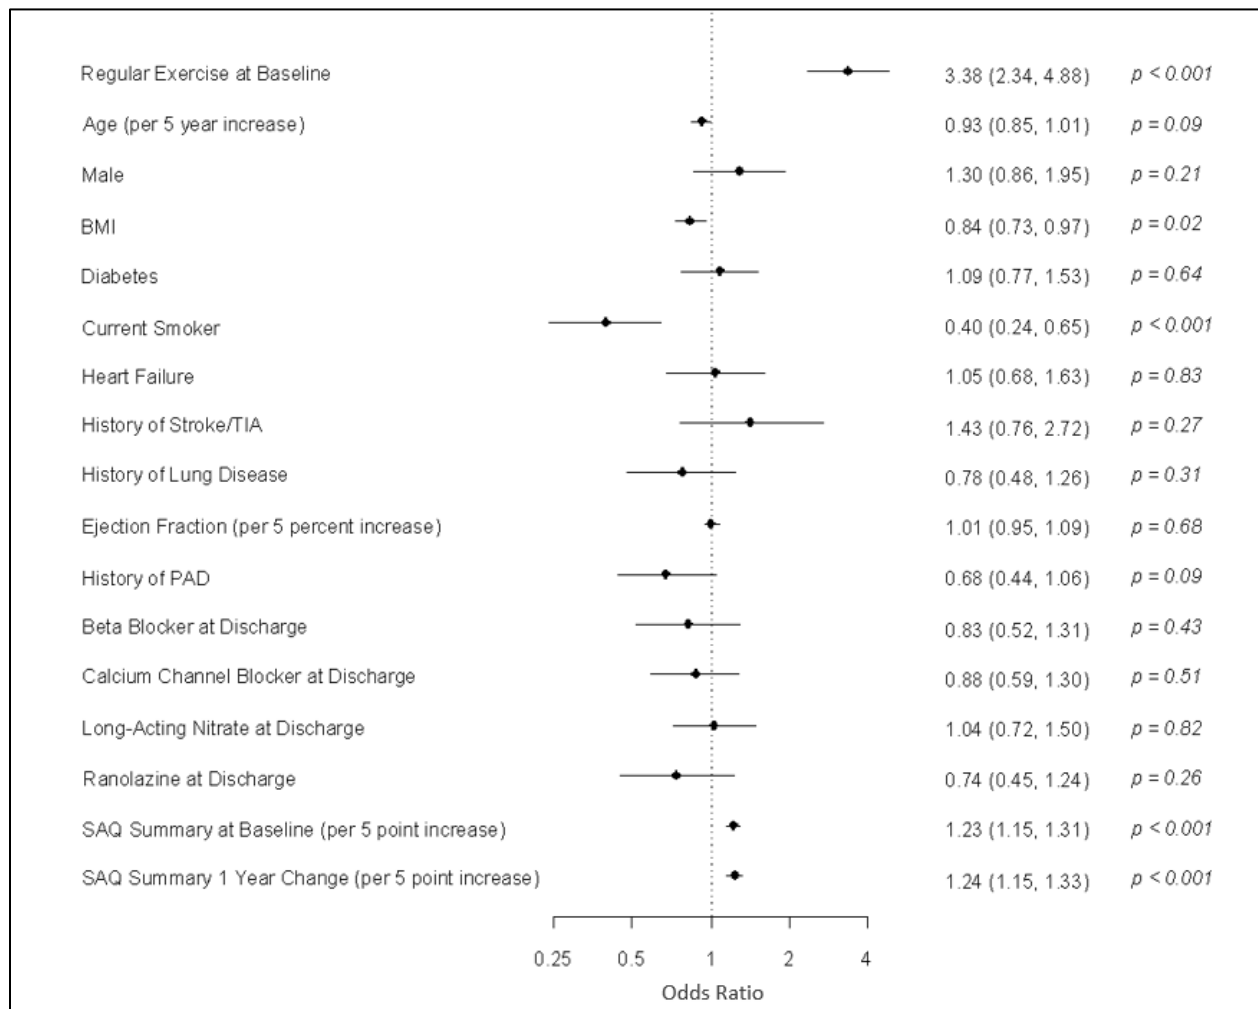

CTO PCI = percutaneous coronary intervention of chronic total occlusion. SAQ = seattle angina questionnaire



**Figure S6. Distribution of exercise frequency at 12 months among patients who did not participate in regular exercise at baseline but did participate in regular exercise at 12 months among those with successful CTO-PCI.**

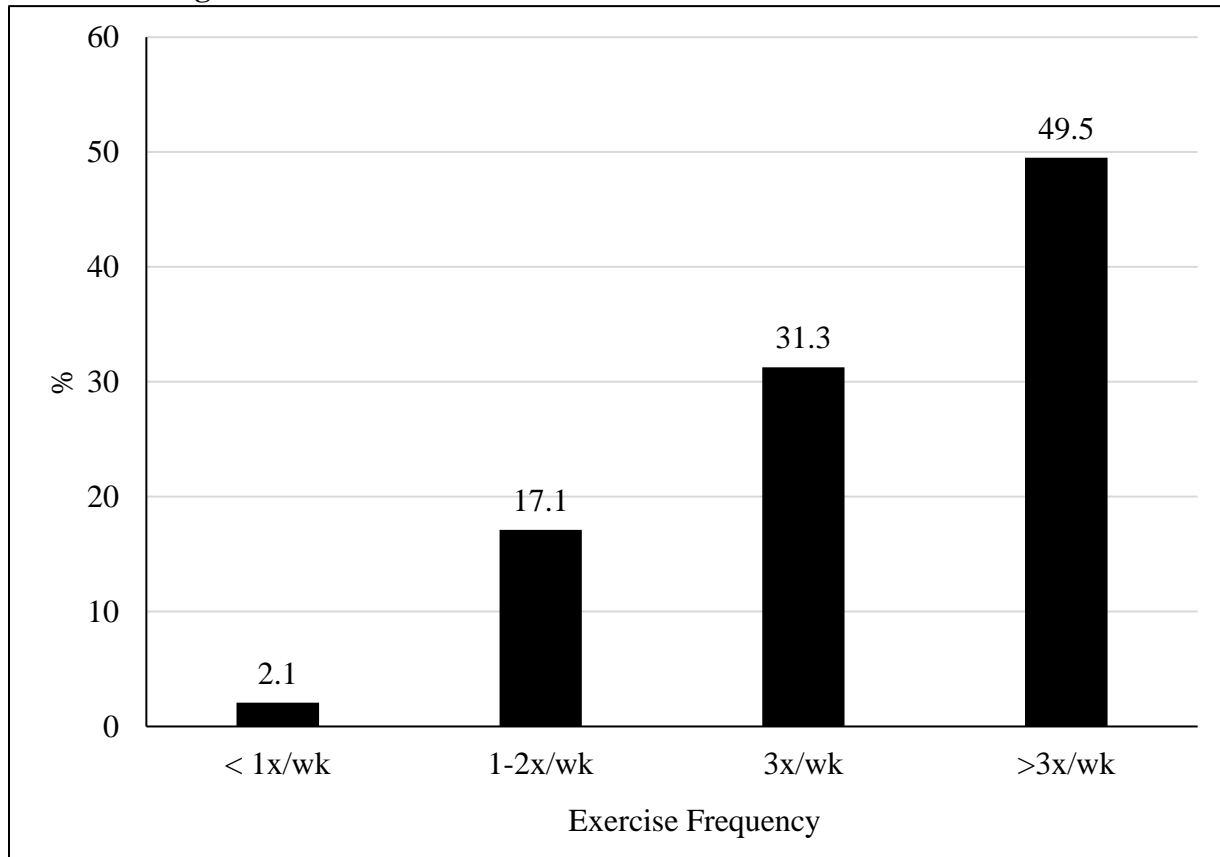

CTO PCI = percutaneous coronary intervention of coronary chronic total occlusion
